# Supplementary material
Source: Springer Nature journal article supplement (https://www.springermedizin.de/resource/supplementary/12946_2003_14_MOESM2_ESM.pdf/9555478)

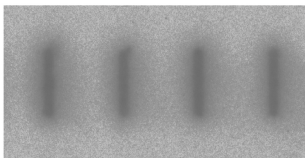

$\alpha$ -NF (nM) 0 10  $10^2$   $10^3$

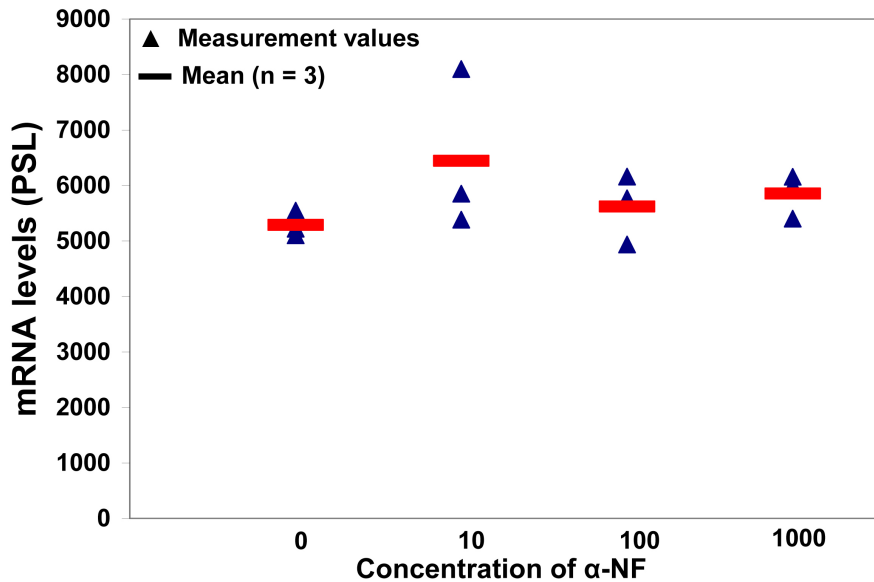

Supplement: MOESM2 [file 9555478]
